# Supplementary material
Source: publisher site journal article supplement (https://www.spandidos-publications.com/2398/downloadSupplementary)
Supplement: Supplementary file 1 [file downloadSupplementary]

## Sheet: Sheet1
Table SI. Genes or gene products interacting with TKIs according to the Drug Gene Interaction Database (n=90).
TKIs	Genes
Sunitinib	FGFR1, FLT3, FLT4, PDGFRB, FLT1, KIT, KDR, CSF1R, PDGFRA, RET, PDGFA, PDGFB, PDGFC, PDGFD, AURKB, ERBB2, BAP1, FGFR2, CA9, MKI67, KRAS, VHL, PTPRB, HMOX1, EGFR, HIF1A
Pazopanib	CSF1R, FGFR1, FLT1, FLT4, KDR, PDGFRA, PDGFRB, KIT, FGFR3, ITK, FGF1, SH2B3, UGT1A1, FGFR2, HLA-B, NF1, MTOR, KRAS, TP53
Sorafenib	BRAF, RAF1, FLT4, KDR, FLT3, PDGFRB, KIT, FGFR1, RET, FLT1, CDK19, CDK8, DDR2, ARAF, CENPE, PDGFRA, FGFR3, PIK3CA, EGFR, ERBB2, PTEN, FGF3, NRAS, MET, VEGFA, AKT1, KRAS, CSF1R, NF1, HMOX1, VHL
Dasatinib	FYN, ABL1, SRC, EPHA2, LCK, YES1, KIT, PDGFRB, STAT5B, ABL2, SIK1, SIK2, SIK3, LYN, HCK, FGR, BLK, SRMS, SLK, BCR, CSF1R, BRAF, DDR2, FRK, KRAS, PDFGRA, HRAS, MET, NF1, ARID1A, EGFR, PIK3CA, CBL, TP53, IDH2, IDH1, APC, CSF3R
Imatinib mesylate	KIT, ABL1, PDGFRB, ABCG2, PVT1
Lapatinib	EGFR, ERBB2, MET, PIK3CA, NF2, ERBB3, ERBB4, SRC, HLA-DQA1, BRAF, HLA-DRB1, PGR, CDKN1B, ESR1, NRG1, FGFR2, BIRC5, CDH1, KRAS
Nilotinib	DDR1, DDR2, ABL1, KIT, NOS2, PDGFRA, PDGFRB, ABL2, BCR, NF1, UGT1A1, FLT3, KRAS
TKIs and heart failurea	FLT1, KIT, KDR, CSF1R, PDGFRA, RET, PDGFA, PDGFB, PDGFC, PDGFD, ERBB2, FGFR2, CA9, KRAS, PTPRB, EGFR, ITK, FGF1, UGT1A1, NF1, MTOR, TP53, BRAF, RAF1, CDK19, CDK8, DDR2, CENPE, PTEN, FGF3, MET, VEGFA, FYN, ABL1, EPHA2, LCK, YES1, STAT5B, ABL2, SIK1, SIK3, LYN, BLK, SLK, BCR, FRK, ARID1A, CBL, IDH2, IDH1, CSF3R, ABCG2, PVT1, ERBB4, PGR, ESR1, NRG1, BIRC5, CSH1, NOS2
aAfter retaining duplicates, 60 genes were initially selected with potential associations with TKIs and heart failure.
